# Supplementary material for: Inflammation and Airway Microbiota during Cystic Fibrosis Pulmonary Exacerbations
Source: PLoS One. 2013 Apr 30;8(4):e62917. doi: 10.1371/journal.pone.0062917 (PMC3639911; doi:10.1371/journal.pone.0062917)
Supplement: Table S2 — Subject microbiologic and clinical data. (XLSX) [file pone.0062917.s009.xlsx]

## Sheet: Sheet1
Subject Identification (SID)	Gender:age	CF Genotype	Sputum culture results (admission)	Antibiotics received (including chronic antibiotics continued during hospitalization)	FEV1, % predicted (admit [change])	Sputum elastase, log µg/mL, (admit [change])	CRP, log mg/L (admit [change])	Shannon diversity (admit [change])	Effective Number of Species (EFS) (admit [change])	Total bacterial load, log rRNA copies/mL (admit[change])	P. aeruginosa qPCR, log rRNA copies/ml (admit[change])	Pseudomonas, % Relative abundance (admit[change])	Staphylococcus, % Relative abundance, (admit[change])	Haemophilus, % RA, (admit [change])	Prevotella, % RA, (admit [change])
1	F:15	Other/Other	MRSA	Azithromycin	107 [-1]	29.8 [-25.3]	0.34 [-0.08]	3.2 [-0.1]	24.5 [-3.2]	5.95 [-0.05]	2.83 [-0.57]	0 [0]	48.3 [-48.2]	0.3 [-0.3]	12.5 [33.3]
			P. aeruginosa	Cefipime
				Tobramycin IV
2	M:12	Other/Other	MRSA	Azithromycin	105 [-2]	20.0 [-14.9]	1.59 [-1.30]	4.4 [-1.1]	79.0 [-52.2]	5.93 [-1.14]	0 [0]	0 [0]	6.8 [-4.7]	0 [0]	35.4 [8.3]
				Cefipime
				Sulfamethoxazole-TMP
				Tobramycin IV
3	M:13	ΔF508/Other	MRSA	Azithromycin	-	-	-	1.2	3.3	4.86	4.41	0	79.3	0	13.3
				Linezolid
				Rifampin
				Tobramycin IV
4	M:15	ΔF508/Other	S. aureus	Azithromycin	-	-	18.30	2.6	13.5	4.4	2.1	0	57.4	0	6.2
			Aspergillus fumigatis	Cefipime
				Tobramycin IV
				Vancomycin
5	M:14	Other	S. aureus	Azithromycin	88 [17]	194.8 [-168.6]	1.80 [-1.50]	2.6 [0.8]	13.2 [16.5]	4.11 [-0.48]	0 [0]	0 [0]	45.3 [-37.3]	0 [0]	11.9 [13.5]
				Cefipime
				Ciprofloxacin
				Tobramycin IV
6	M:32	ΔF508/ ΔF508	MRSA	Azithromycin	31 [4]	932.0 [-639.2]	9.03 [-6.64]	0.2 [-0.1]	1.2 [-0.2]	4.99 [1.57]	5.31 [-5.31]	97.9 [2.1]	2.1 [-2.1]	0 [0]	0 [0]
			P. aeruginosa	Linezolid
				Meropenem
				Rifampin
				Sulfamethoxazole-TMP
				Tobramycin IV
7	F:20	ΔF508/ ΔF508	P. aeruginosa	Azithromycin	41 [24]	80.0 [-33.3]	47.30 [-45.40]	0.2 [-0.1]	1.2 [-0.1]	5.82 [0.59]	0 [0]	99.0 [0.8]	0 [0]	0 [0]	0 [0.1]
			S. aureus	Ciprofloxacin
				Doxycycline
				Levofloxacin
				Piperacillin-Tazobactam
8	M:22	ΔF508/ ΔF508	P. aeruginosa	Azithromycin	43 [20]	37.8 [-20.2]	1.29 [-0.51]	3.1 [-0.4]	22.2 [-7.3]	5.55 [-1.5]	4.89 [-3.27]	22.1 [-22.0]	0 [0]	0 [0]	42.1 [-2.5]
				Cefipime
				Ciprofloxacin
				Tobramycin IV
9	F:37	ΔF508/ ΔF508	P. aeruginosa	Azithromycin	30 [0]	1008.0 [-443.2]	6.62 [-0.29]	0.6 [0.1]	1.8 [0.1]	5.87 [-0.19]	5.49 [-0.17]	91.3 [-0.9]	0 [0]	0 [0]	0.4 [-0.4]
				Meropenem
				Tobramycin IV
10	F:20	ΔF508/Other	MRSA	Azithromycin	50 [21]	27.7 [-21.9]	38.60 [-37.80]	1.3 [0.4]	3.6 [2.0]	4.61 [-1.17]	5.03 [-2.48]	78.1 [-40.4]	0 [0.4]	0 [0]	4.3 [-4.3]
			P. aeruginosa	Doxycycline
				Linezolid
				Meropenem
				Tobramycin IV and inhaled
11	M:19	ΔF508/Other	MRSA	Azithromycin	30	1716.0	28.60	1.8	6	4.8	4.41	83.3	10.6	0	0
			P. aeruginosa	Aztreonam
				Sulfamethoxazole-TMP
				Linezolid
				Meropenem
				Rifampin
				Tobramycin IV
				Vancomycin
12	F:7	ΔF508/ ΔF508	S. aureus	Amikacin, Inhaled	35	99.4	6.83	1.6	5	4.29	0	0	4.5	0	28.6
			Scedosporium apiospermum	Azithromycin
			Pseudallescheria boydII	Cefipime
			Graphium	Ethambutol
				Rifampin
				Tobramycin, Inhaled
13	F:20	ΔF508/ ΔF508	P. aeruginosa	Azithromycin	26 [4]	1324.0 [-240.0]	58.90 [-36.00]	1 [-0.9]	2.7 [-1.6]	5.98 [0.02]	5.72 [0.03]	99.6 [0.2]	0 [0]	0 [0]	0 [0]
				Inhaled Aztreonam
				Ciprofloxacin
				Meropenem
14	M:16	ΔF508/Other	P. aeruginosa	Azithromycin	36 [29]	119.3 [-75.1]	41.40 [-39.60]	2.6 [0.9]	13.1 [19.1]	5.40 [-0.02]	5.41 [-2.73]	57.4 [-57.4]	0 [0]	5.6 [-5.6]	17.1 [10.9]
				Cefipime
				Meropenem
				Tobramycin IV and inhaled
15	F:15	ΔF508/Other	P. aeruginosa	Azithromycin	82 [34]	350.3 [-275.3]	2.24 [-1.61]	2.4 [1.0]	11.5 [20.7]	4.05 [0.06]	3.03 [-3.03]	10.5 [-5.7]	0 [0.1]	0 [0.1]	79.8 [-51.9]
				Cefipime
				Ciprofloxacin
				Tobramycin IV
16	F:15	ΔF508/Other	P. aeruginosa	Ciprofloxacin	69 [7]	107.8	18.30 [-16.20]	1.7 [0]	5.2 [0.3]	3.97 [-0.34]	4.15 [-4.15]	53.1 [-52.6]	0 [73.6]	0 [0]	0 [0.1]
				Meropenem
				Tobramycin IV
17	F:21	ΔF508/ ΔF508	P. aeruginosa	Ceftazidime	62 [20]	-	1.75 [-1.51]	0.2 [1.9]	1.3 [7.4]	6.08 [-2.48]	5.87 [-3.38]	68.2 [-33.7]	0 [0.1]	0 [0.1]	0.3 [12.1]
				Imipenem
18	M:20	ΔF508/ ΔF508	S. aureus	Azithromycin	39 [20]	19.0 [38.3]	4.10 [-3.91]	3.0 [0.1]	20.3 [1.3]	4.08 [0.83]	2.80 [-2.80]	4.2 [-3.0]	0 [0.1]	0 [0]	28.9 [-5.6]
			P. aeruginosa	Ceftazidime
				Doxycycline
				Tobramycin IV
19	F:27	ΔF508/ ΔF508	S. aureus	Azithromycin	36 [-7]	442.4 [-425.5]	-	4.1 [-1.8]	59.1 [-49.1]	4.71 [0.63]	1.58 [-1.58]	0.7 [-0.7]	22.1 [-22.1]	0 [0]	10.1 [50.4]
				Aztreonam, Inhaled
				Cefipime
				Ceftazidime
				Doxycycline
				Tobramycin IV and inhaled
20	F:16	ΔF508/Other	S. aureus	Azithromycin	107	291.4	2.64	3.1	22.2	6.49	2.04	0	0.4	0	56.5
				Cefipime
				Dicloxacillin
				Tobramycin IV
21	M:24	ΔF508/Other	Aspergillus fumigatis	Cefipime	45 [4]	31.3 [-23.4]	7.43 [0.88]	2.6 [1.0]	13.6 [23.0]	4.89 [-0.19]	2.85 [-2.85]	0.9 [-0.9]	0 [0]	0 [0]	31.3 [8.7]
			Scedosporium species	Tobramycin IV
