# Supplementary material for: Inflammation and Airway Microbiota during Cystic Fibrosis Pulmonary Exacerbations
Source: PLoS One. 2013 Apr 30;8(4):e62917. doi: 10.1371/journal.pone.0062917 (PMC3639911; doi:10.1371/journal.pone.0062917)
Supplement: Table S3 — Microbiota detected from all sputum samples (early and late treatment). Genera present in greater than 1% relative abundance are listed. N = 37 sputum samples. (XLSX) [file pone.0062917.s010.xlsx]

## Sheet: Sheet1
Table S3. Microbiota detected from all sputum samples (early and late treatment). Genera present in greater than 1% relative abundance are listed. N=37 sputum samples
Genus	Number (%) of Samples with RA > 1%
Abiotrophia	1 (2.7%)
Actinomyces	6 (16.2%)
Anaeroarcus	1 (2.7%)
Aquabacterium	1 (2.7%)
Asticcacaulis	1 (2.7%)
Atopobium	5 (13.5%)
Campylobacter	4 (10.8%)
Capnocytophaga	4 (10.8%)
Fusobacterium	4 (10.8%)
Granulicatella	10 (27.0%)
Haemophilus	1 (2.7%)
Lactobacillus	3 (8.1%)
Lactococcus	2 (5.4%)
Leptotrichia	9 (24.3%)
Limnobacter	1 (2.7%)
Methylobacterium	2 (5.4%)
Mycoplasma	1 (2.7%)
Neisseria	1 (2.7%)
Peptostreptococcus	1 (2.7%)
Porphyromonas	3 (8.1%)
Prevotella	24 (64.9%)
Pseudomonas	20 (54.1%)
Rothia	14 (37.8%)
Shimazuella	4 (10.8%)
Staphylococcus	12 (32.4%)
Streptococcus	17 (45.9%)
Streptophyta	3 (8.1%)
Veillonella	25 (67.6%)
Xylanibacter	2 (5.4%)
